# Supplementary material for: Nonionic star polymers with upper critical solution temperature in aqueous solutions
Source: Royal Society of Chemistry journal article supplement (doi:10.1039/d2py00216g), 2022-01-01
Supplement: d2py00216g1.pdf [file d2py00216g1.pdf]

## Nonionic Star Polymers with Upper Critical Solution Temperature in Aqueous Solutions

Aliaksei Aliakseyeu<sup>1</sup>, Raman Hlushko<sup>1</sup> and Svetlana A. Sukhishvili<sup>1\*</sup>

<sup>1</sup>*Department of Materials Science & Engineering, Texas A&M University,  
College Station, Texas 77843, USA*

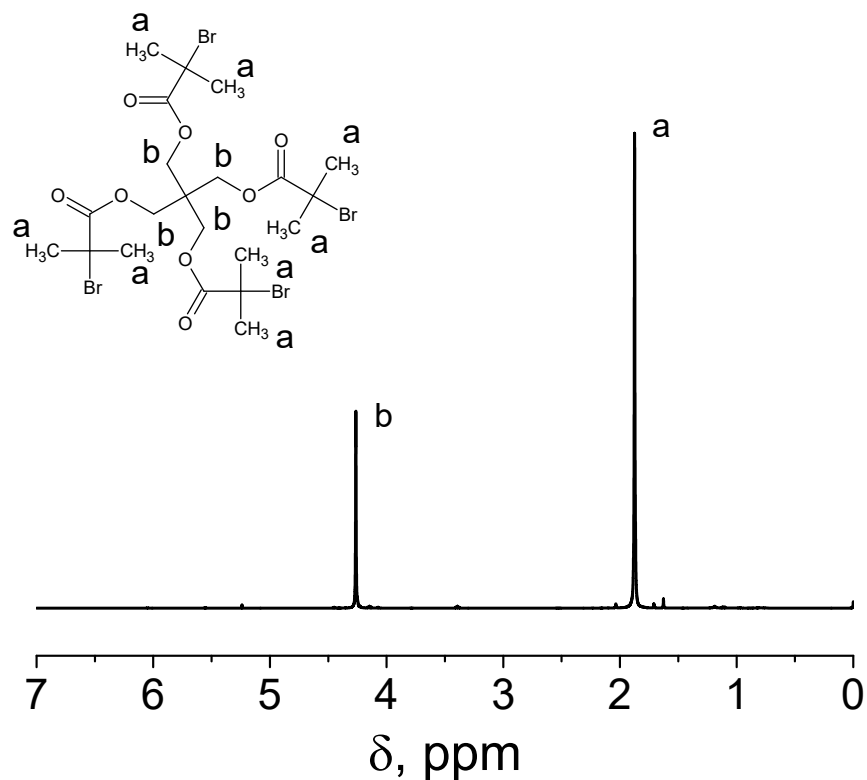

**Fig. S1.** <sup>1</sup>H NMR spectrum of pentaerythritol tetrakis(2-bromoisobutyrate) in CDCl<sub>3</sub>.

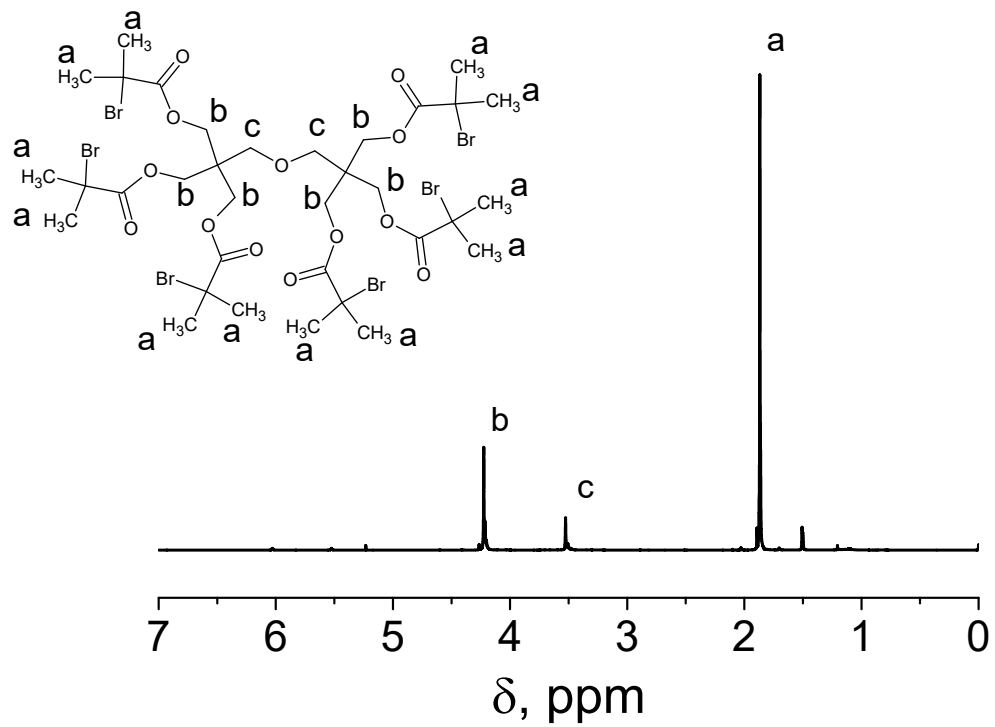

**Fig. S2.** <sup>1</sup>H NMR spectrum of dipentaerythritol hexakis(2-bromoisobutyrate) in CDCl<sub>3</sub>.

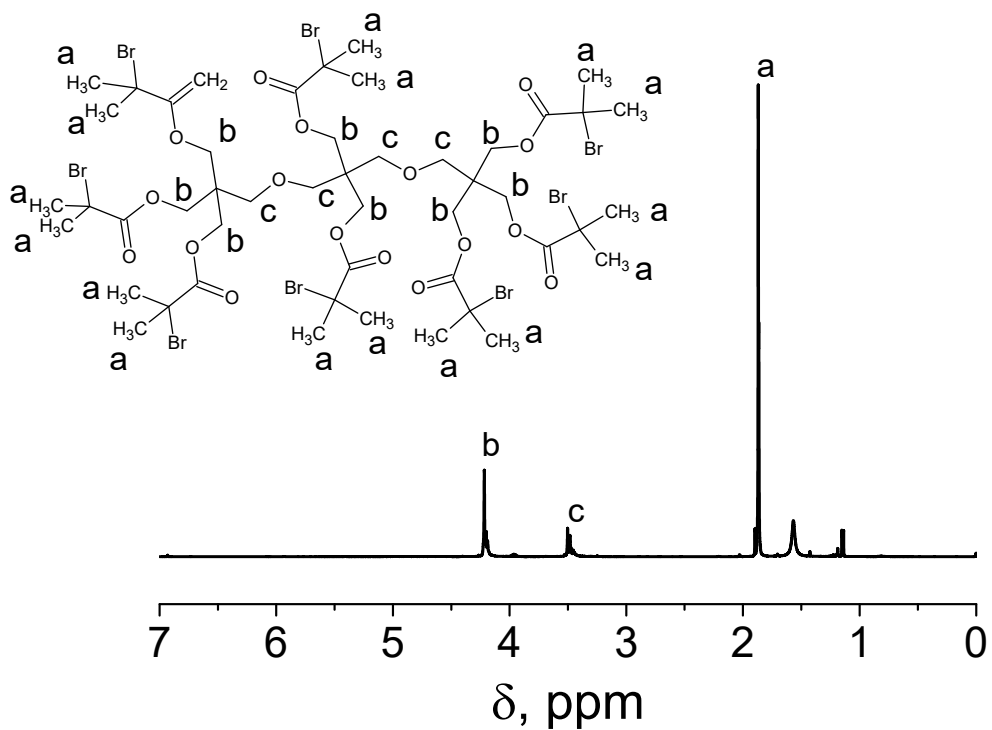

**Fig. S3.** <sup>1</sup>H NMR spectrum of tripentaerythritol octakis(2-bromoisobutyrate) in CDCl<sub>3</sub>.

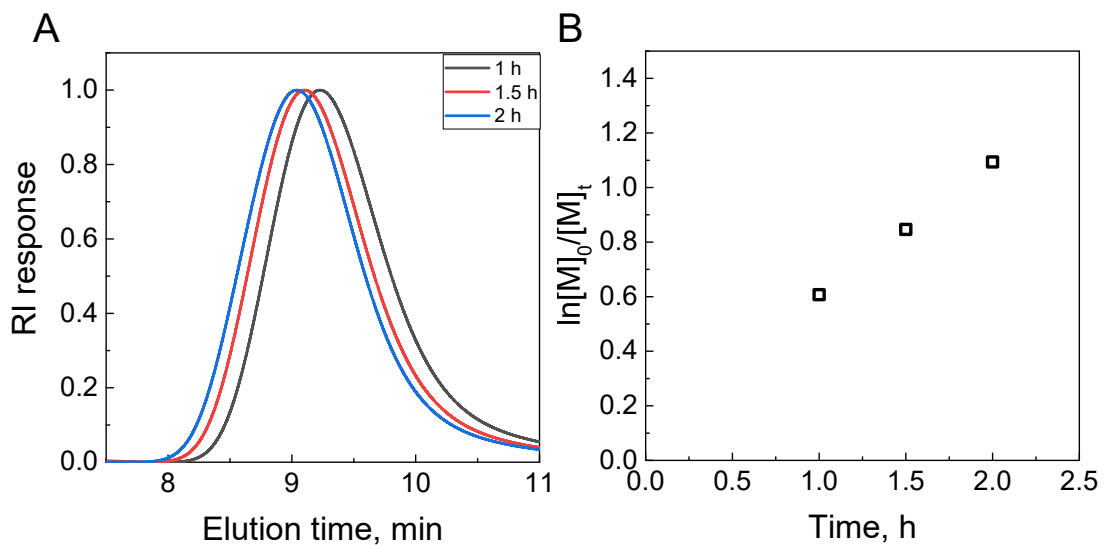

**Fig. S4.** GPC traces (A) and time evolution of  $\ln[M]_0/[M]_t$  (B) during synthesis of linear BOC PAMA via ARGET ATRP polymerization of 2-BOC AMA using a linear ATRP initiator.

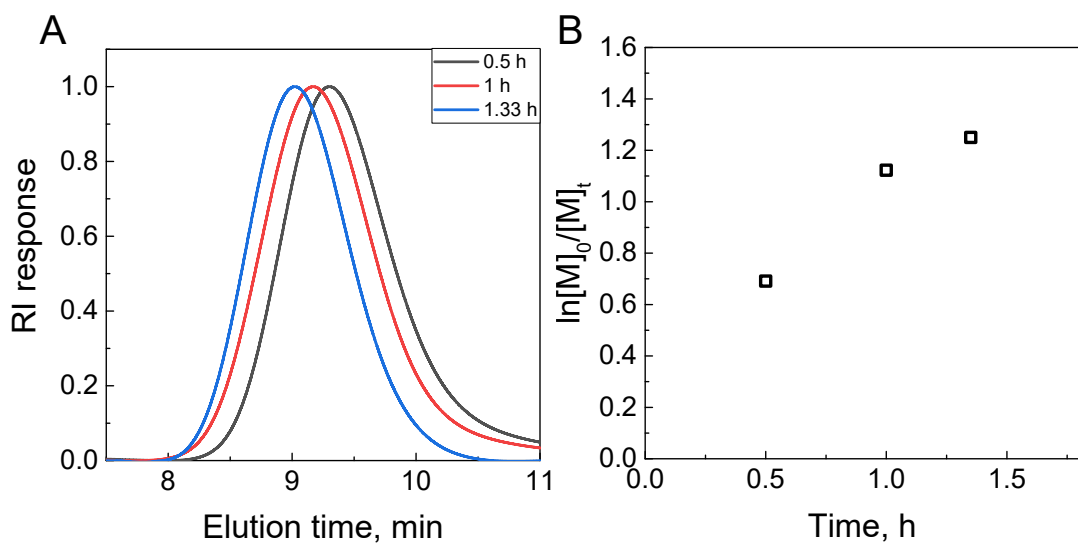

**Fig. S5.** GPC traces (A) and time evolution of  $\ln[M]_0/[M]_t$  (B) during synthesis of 6-arm BOC PAMA via ARGET ATRP polymerization of 2-BOC AMA using a 6-arm ATRP initiator.

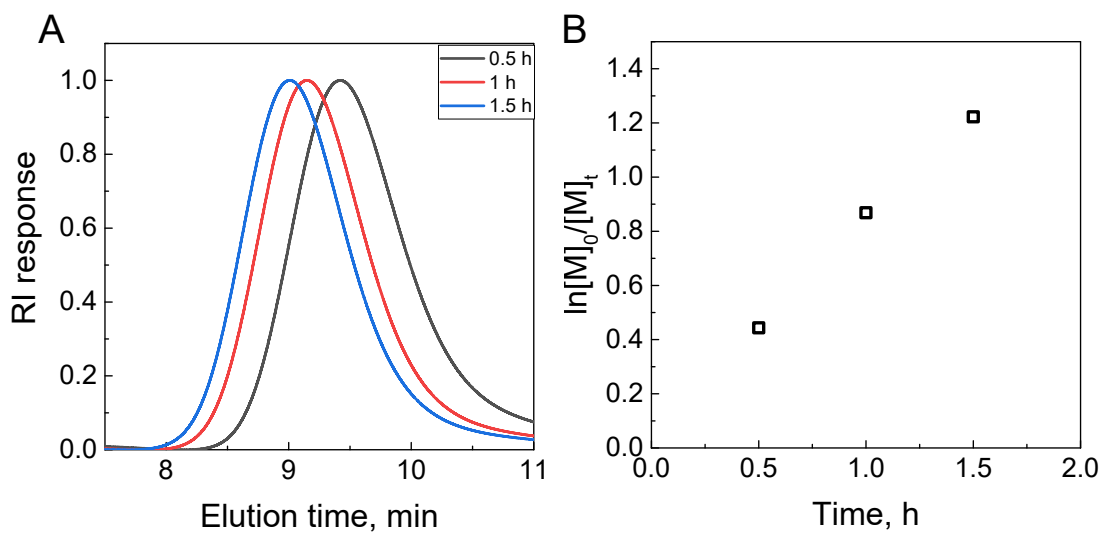

**Fig. S6.** GPC traces (A) and time evolution of  $\ln[M]_0/[M]_t$  (B) during synthesis of 8-arm BOC PAMA via ARGET ATRP polymerization of 2-BOC AMA using an 8-arm ATRP initiator.

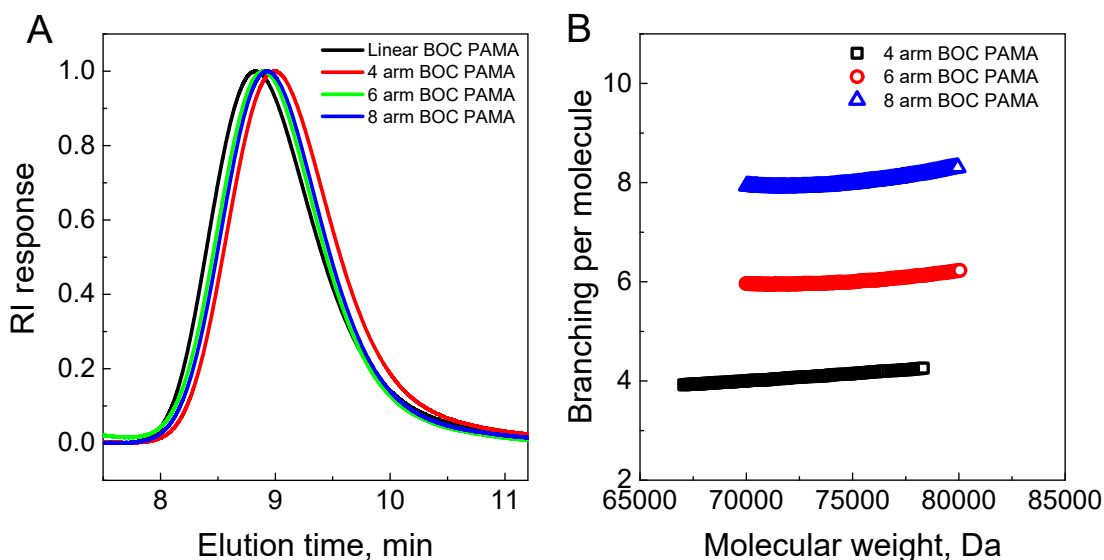

**Fig. S7.** (A) GPC traces of linear, 4-, 6-, and 8-arm BOC PAMAs in DMF (flow rate 0.2 ml/min) as monitored by a RI detector. (B) Branching per molecule for 4-, 6-, and 8-arm BOC PAMAs based on the viscosity measurements performed using a Wyatt Viscostar III detector.

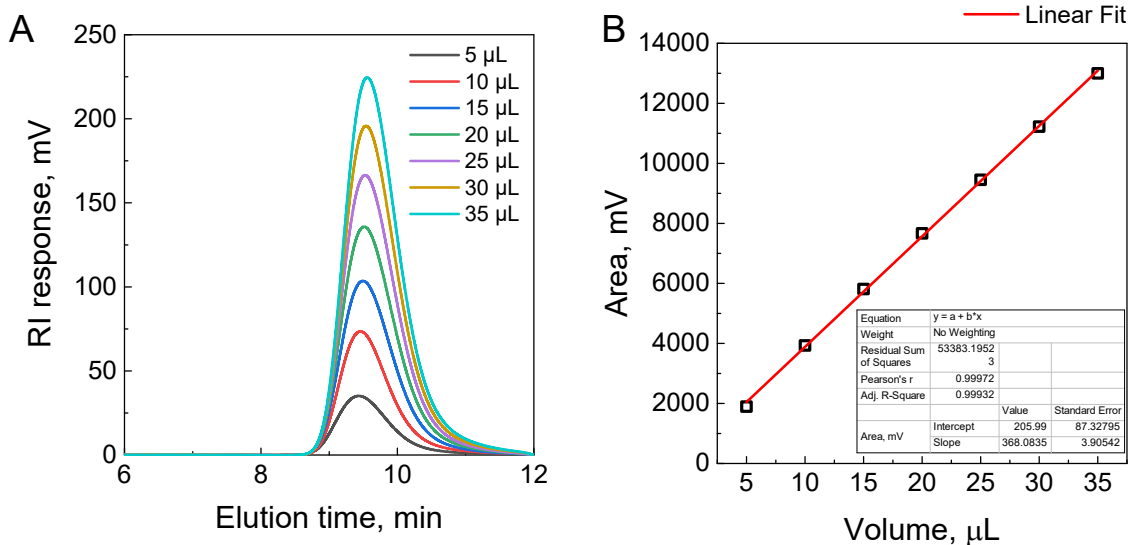

**Fig. S8.** Calibration of the detector response. (A) GPC traces of polystyrene solutions in DMF (flow rate 0.2 ml/min) with different injection volumes as monitored by a RI detector. (B) RI response as a function of injection volume for polystyrene.

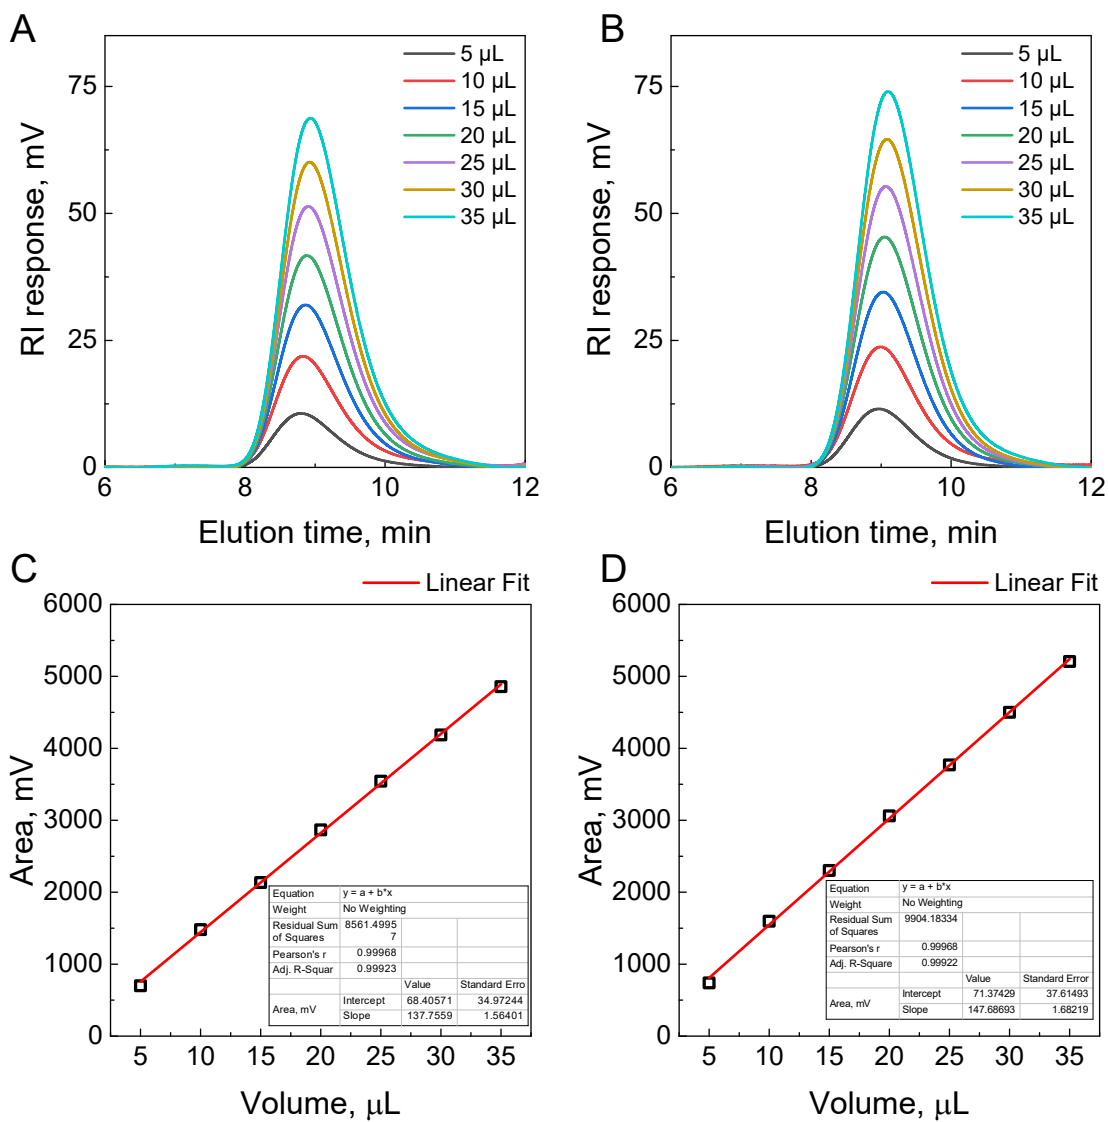

**Fig. S9.** GPC traces of linear (A) and 4-arm (B) BOC PAMAs in DMF (flow rate 0.2 ml/min) at different injection volumes as monitored by a RI detector, and the corresponding RI responses as a function of injection volume for linear (C) and 4-arm (D) BOC PAMAs.

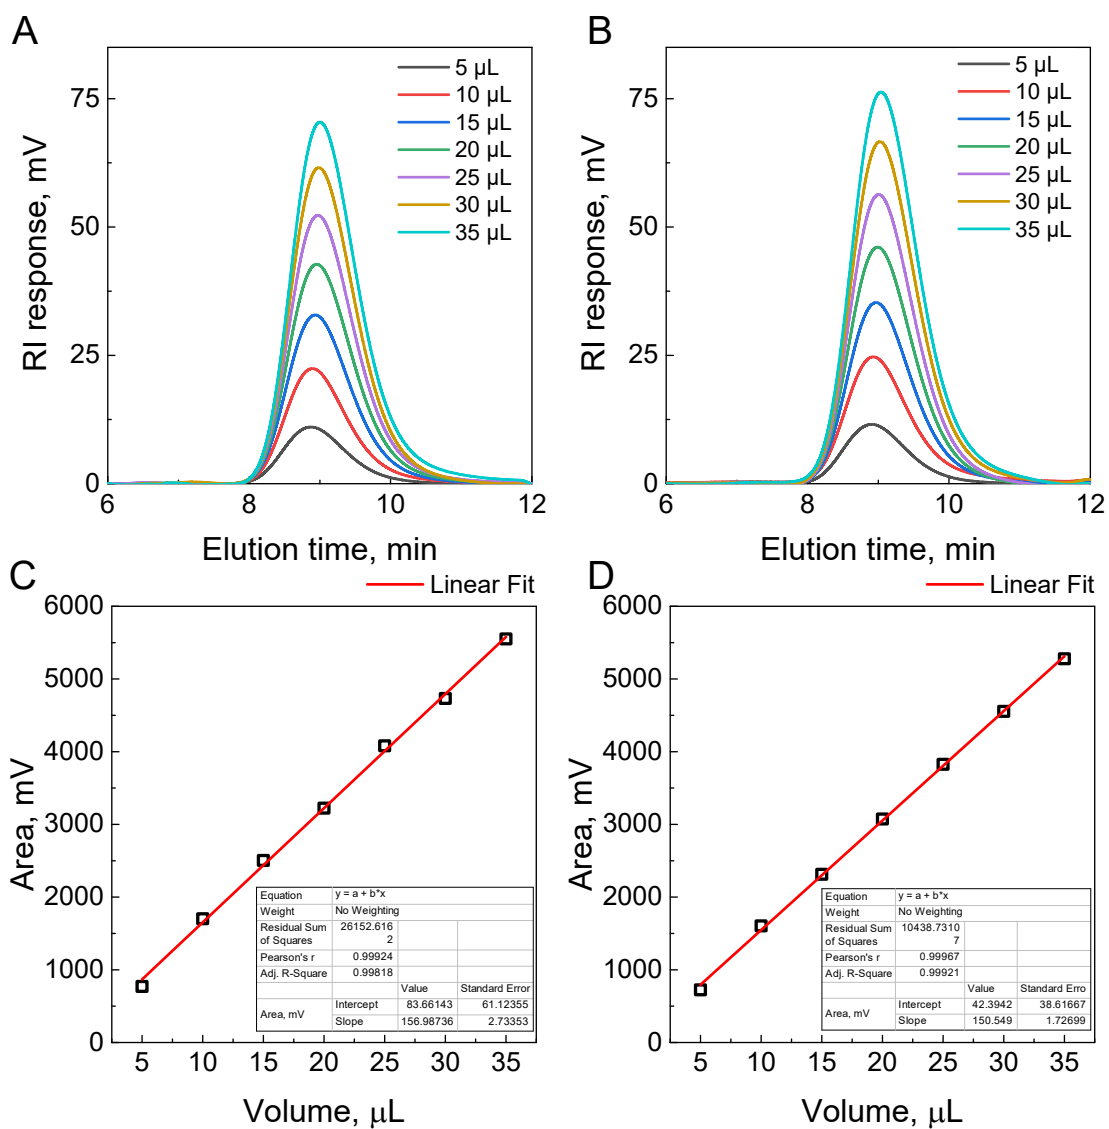

**Fig. S10.** GPC traces of 6-arm (A) and 8-arm (B) BOC PAMAs in DMF (flow rate 0.2 ml/min) at different injection volumes as monitored by a RI detector and the corresponding RI responses as a function of injection volume for 6-arm (C) and 8-arm (D) BOC PAMAs.

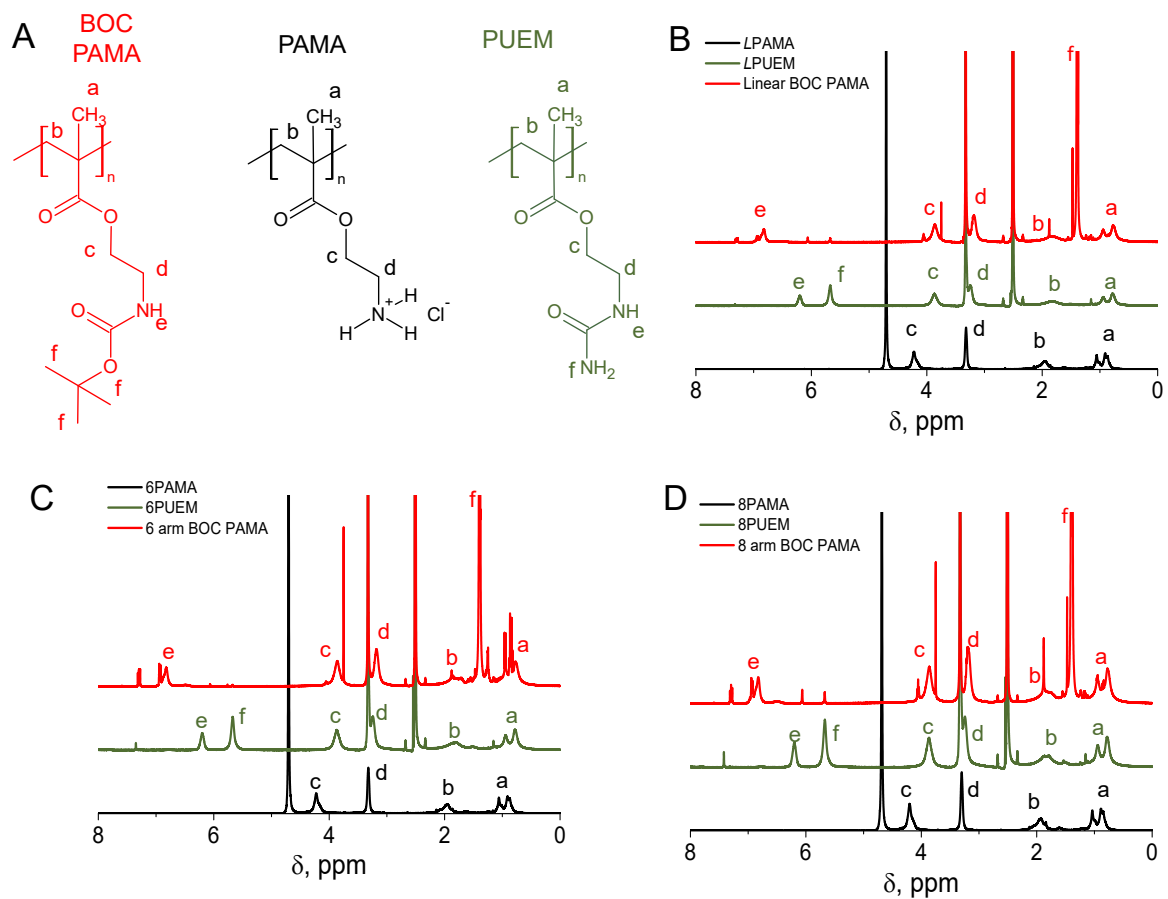

**Fig. S11.** Chemical structures of BOC PAMA, PAMA and PUEM (A), and  $^1\text{H}$  NMR spectra of linear (B) 6-arm (C) and 8-arm (D) BOC PAMAs ( $\text{d}_6$ -DMSO), PAMAs ( $\text{D}_2\text{O}$ ) and PUEMs ( $\text{d}_6$ -DMSO).



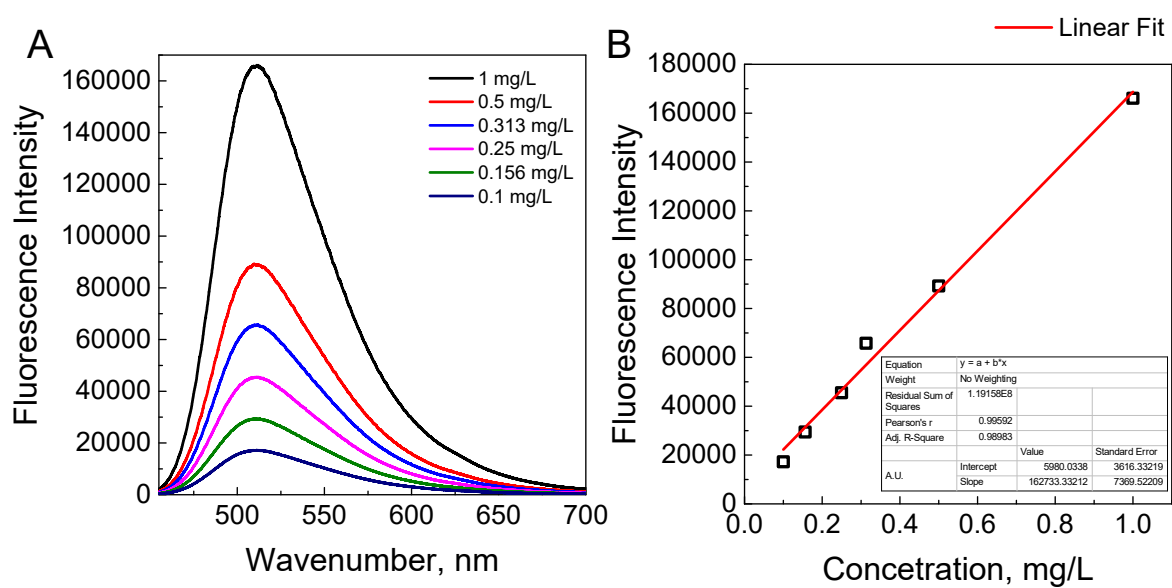

**Fig. S12.** Fluorescence spectra ( $\lambda_{\text{ex}} = 445 \text{ nm}$ ) of proflavine solutions at different concentrations (A) and the resultant calibration curve (B). The solution pH was adjusted to 6.

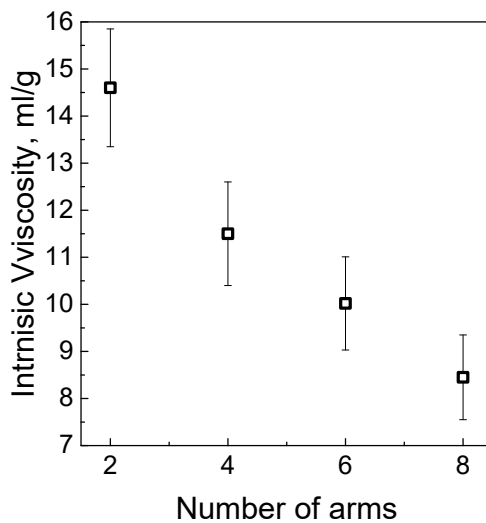

**Fig. S13.** Intrinsic viscosity of PUEMs as a function of number of arms.

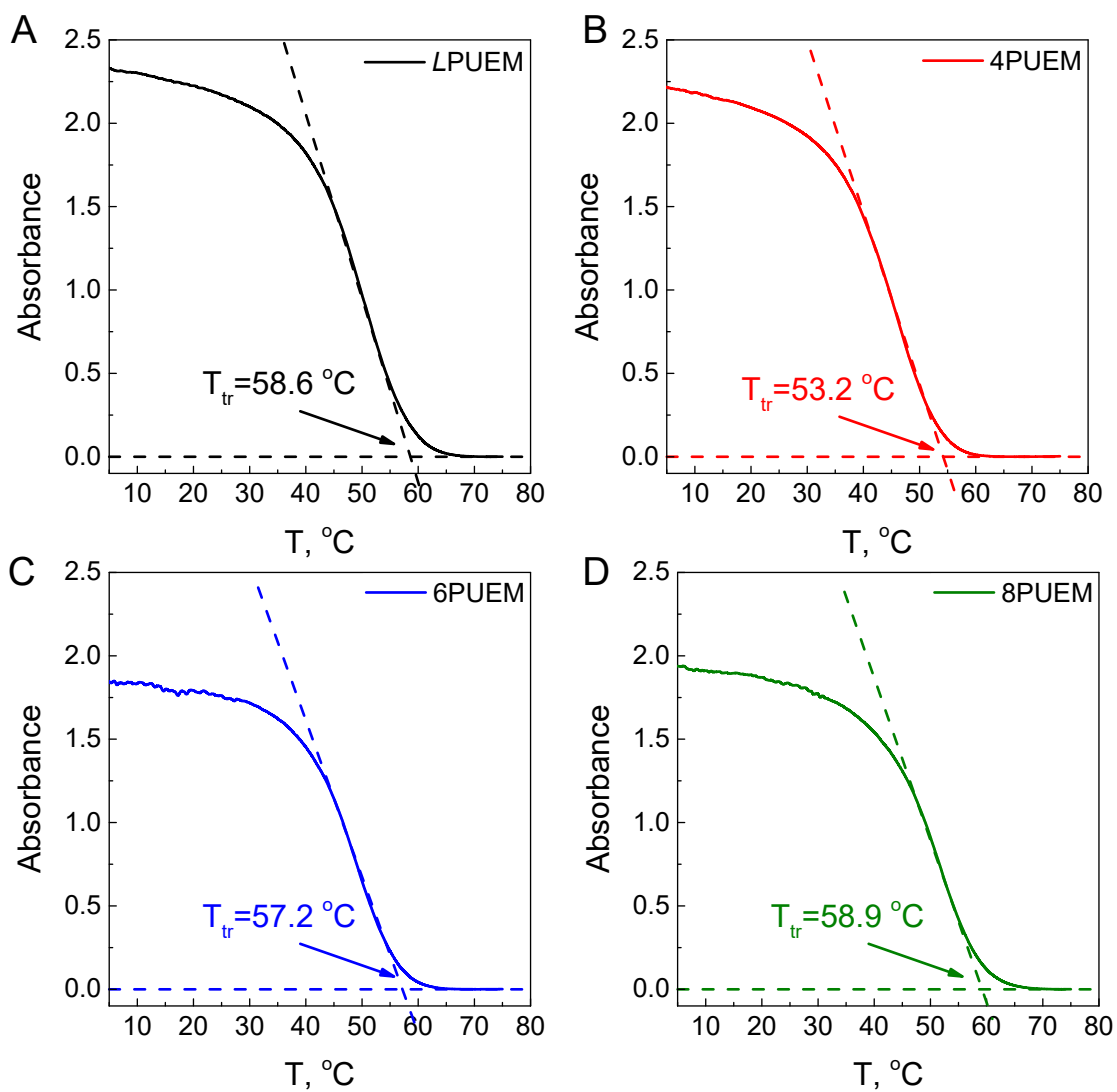

**Fig. S14.** Determination of transition temperature from the turbidity measurements of 1.0 mg/mL aqueous solutions of LPUEM (A), 4PUEM (B), 6PUEM (C) and 8PUEM (D) at 620 nm at a cooling rate of 0.5 °C/min.

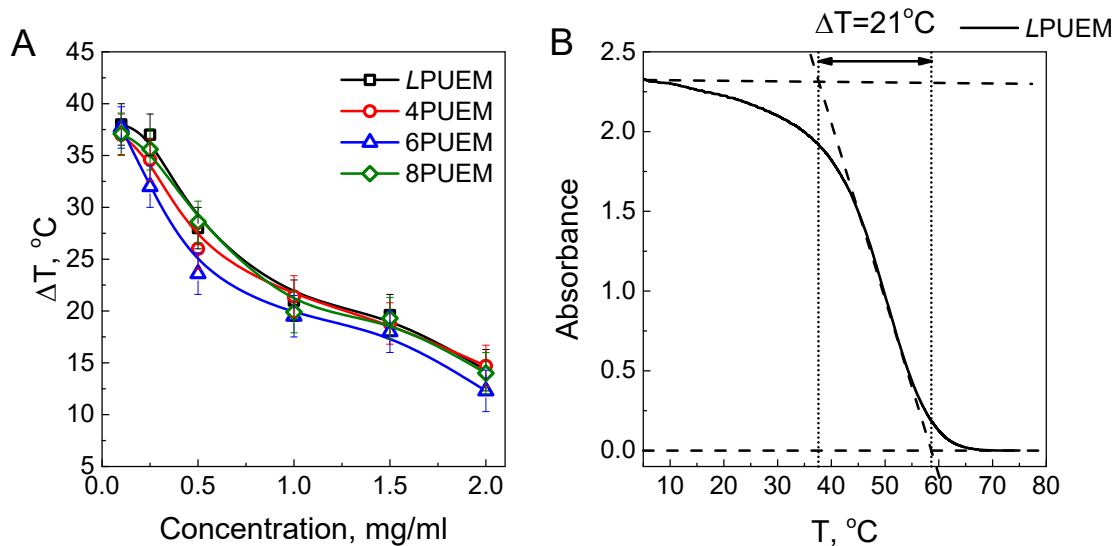

**Fig. S15.** (A) The effect of polymer concentration on the phase transition window ( $\Delta T$ ) for LPUEM (squares), 4PUEM (circles), 6PUEM (triangles) and 8PUEM (diamonds). (B) An example of determination of  $\Delta T$  from the turbidity measurements for 1.0 mg/mL aqueous solutions of LPUEM at 620 nm at a cooling rate of 0.5 °C/min.

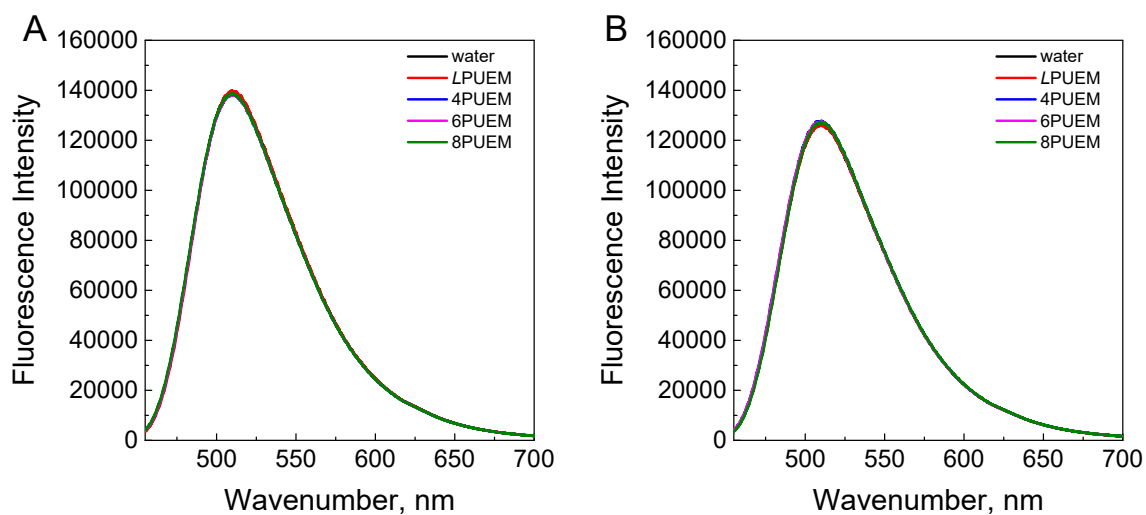

**Fig. S16.** Fluorescence emission spectra ( $\lambda_{\text{ex}}=445$  nm) of proflavine in the presence of 0.5 mg/ml (A) and 2 mg/ml (B) solutions of linear, 4-, 6- and 8-arm PUEMs above UCST transition. Temperature was 65 °C for 0.5 mg/ml solutions and 75 °C for 2 mg/ml solutions. All solutions were adjusted to pH 6.

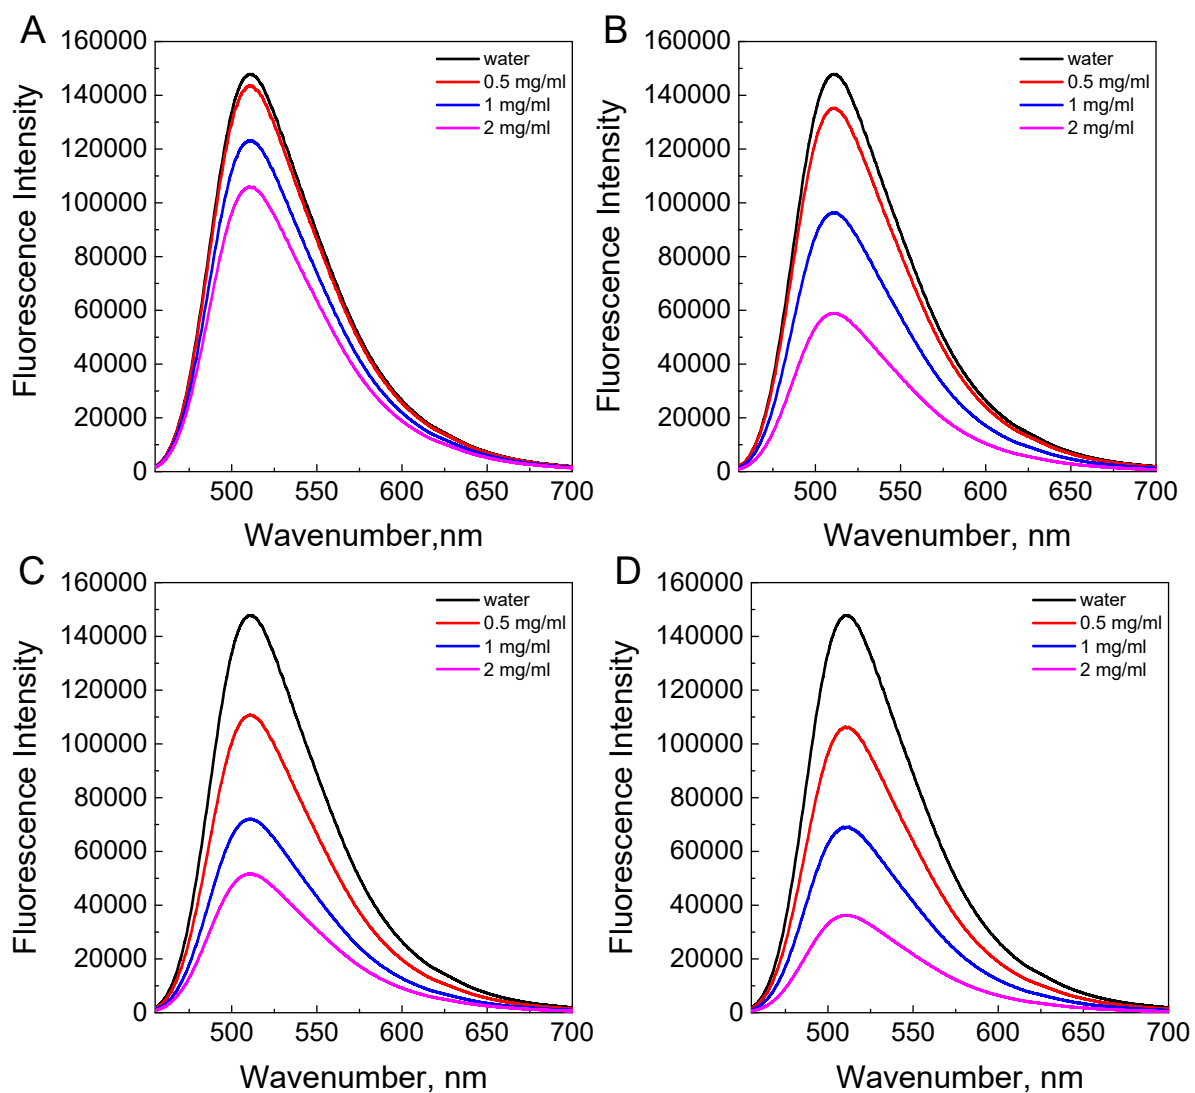

**Fig. S17.** Fluorescence emission spectra ( $\lambda_{\text{ex}}=445$  nm) of proflavine supernatant solution after centrifugation of 0.5, 1 and 2 mg/ml solutions of linear (A), 4-arm (B), 6-arm (C), and 8-arm PUEMs (D) at 5 °C. All solutions were adjusted to pH 6.

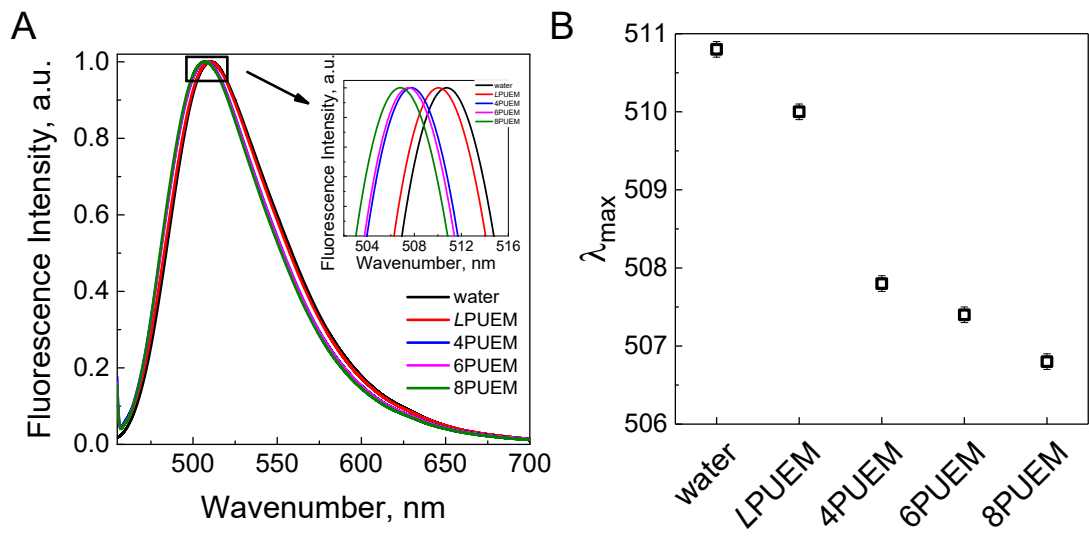

**Fig. S18.** (A) Fluorescence emission spectra ( $\lambda_{ex} = 445$  nm) of proflavine in water or 2 mg/ml aqueous solutions of linear, 4-, 6- and 8-arm PUEMs at 5 °C. (B) Wavelength at the maximum of fluorescent emission of proflavine below the PUEM transition temperature. All solutions were adjusted to pH 6.

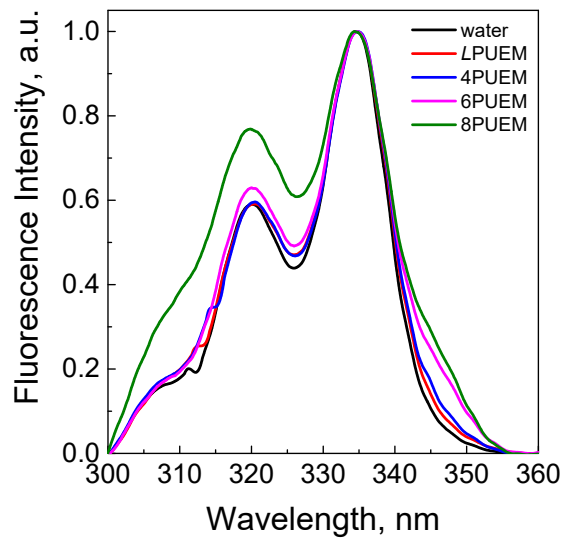

**Fig. S19.** Fluorescence excitation spectra of pyrene in aqueous solutions at 75 °C in the absence and presence of the UCST polymers. Polymer concentrations were 1 mg/ml. All solutions were adjusted to pH 6.
